# Supplementary material for: Photocurrent-generating properties of bulk and few-layered Cd(ii) coordination polymers based on a rigid dicarboxylate ligand
Source: Royal Society of Chemistry journal article supplement (doi:10.1039/c6dt00271d), 2016-01-01
Supplement: c6dt00271d1.pdf [file c6dt00271d1.pdf]

# Photocurrent-generating properties of bulk and few-layered Cd(II) coordination polymers based on a rigid dicarboxylate ligand

Peng Gang Jiang,<sup>a</sup> Pan Zhang,<sup>a</sup> Yun Gong<sup>\*a</sup> and Jian Hua Lin<sup>\*a, b</sup>

<sup>a</sup> Department of Applied Chemistry, College of Chemistry and Chemical Engineering, Chongqing University, Chongqing 400030, P. R. China Tel: +86-023-65106150 E-mail: gongyun7211@cqu.edu.cn

<sup>b</sup> State Key Laboratory of Rare Earth Materials Chemistry and Applications, College of Chemistry and Molecular Engineering, Peking University, Beijing 100871, P. R. China Tel: +86-010-62753541 E-mail: jhlin@pku.edu.cn

**Table S1** Selected bond lengths (Å) and angles (°) for CPs **1** and **2**

| <i>CP 1</i>       |           |                   |           |
|-------------------|-----------|-------------------|-----------|
| Cd(1)-O(5)        | 2.114(9)  | Cd(1)-O(1)        | 2.304(9)  |
| Cd(1)-O(3)#1      | 2.206(12) | Cd(2)-O(4)#1      | 2.200(10) |
| Cd(2)-O(2)        | 2.379(9)  | Cd(2)-O(7)        | 2.301(13) |
| Cd(2)-O(8)        | 2.375(17) | Cd(2)-O(1)        | 2.358(8)  |
| O(5)#2-Cd(1)-O(5) | 180.0(7)  | O(5)#2-Cd(1)-O(1) | 86.2(4)   |
| O(5)-Cd(1)-O(3)#1 | 92.2(4)   | O(3)#1-Cd(1)-O(1) | 87.7(4)   |
| O(6)-Cd(2)-O(8)   | 167.7(5)  | O(1)-Cd(2)-O(2)   | 54.9(3)   |
| O(6)-Cd(2)-O(1)   | 97.3(3)   | O(7)-Cd(2)-O(8)   | 83.4(7)   |
| O(4)#1-Cd(2)-O(2) | 156.6(4)  | O(4)#1-Cd(2)-O(1) | 105.3(3)  |
| <i>CP 2</i>       |           |                   |           |
| Cd(1)-O(5)        | 2.244(9)  | Cd(1)-O(2)        | 2.286(9)  |

|                   |          |                     |          |
|-------------------|----------|---------------------|----------|
| Cd(1)-O(3)#2      | 2.546(9) | Cd(1)-O(1)          | 2.496(9) |
| Cd(1)-O(4)#2      | 2.304(9) | Cd(1)-O(3)#3        | 2.391(9) |
| O(2)-Cd(1)-O(1)   | 54.3(3)  | O(1)-Cd(1)-O(3)#2   | 176.7(3) |
| O(5)-Cd(1)-O(2)   | 137.8(4) | O(4)#2-Cd(1)-O(3)#3 | 85.7(3)  |
| O(4)#2-Cd(1)-O(1) | 129.6(3) | O(2)-Cd(1)-O(3)#3   | 104.7(3) |

Symmetry transformations used to generate equivalent atoms:

#1  $x-1/2, -y-1/2, z-1/2$     #2  $-x+1, -y, -z$     #3  $-x+1/2, -y, z+1/2$

(a)

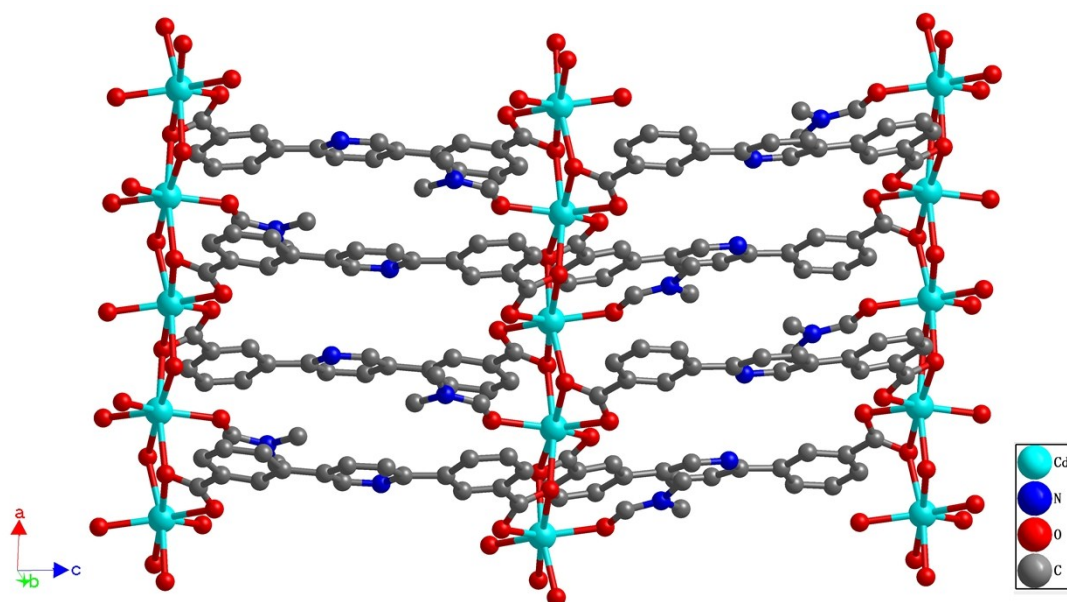

(b)

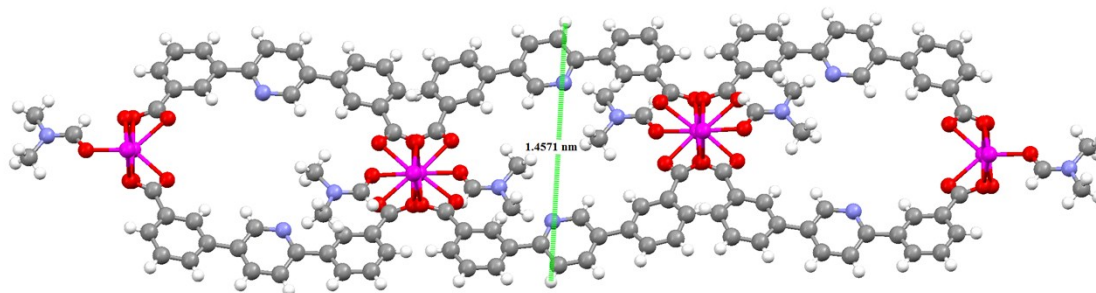

(c)

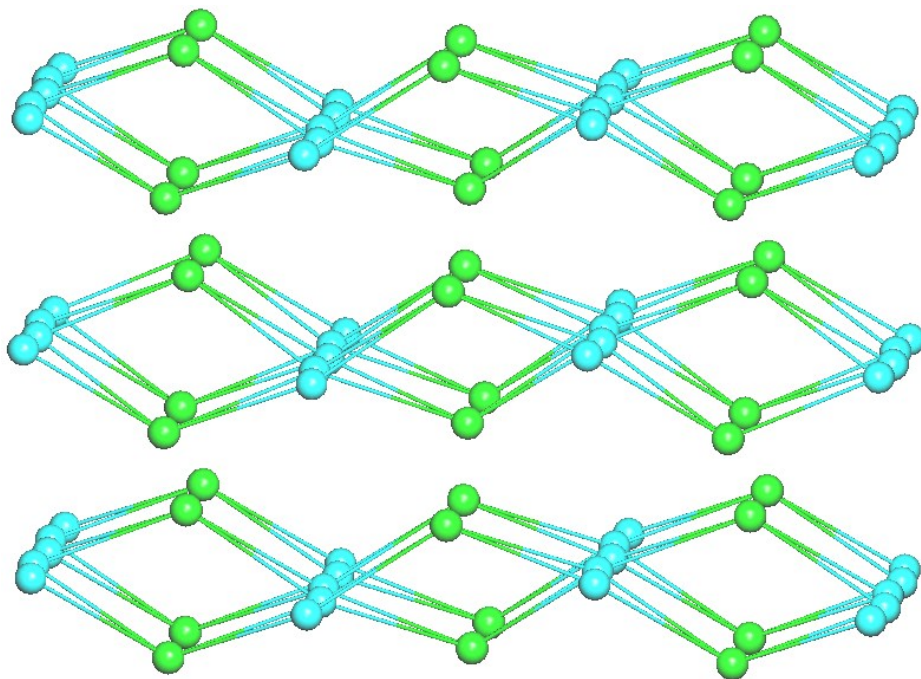

**Fig. S1** 2D architecture constructed by Cd(II) ions and  $L^{2-}$  ligands (H atoms and uncoordinated DMF molecules omitted for clarity) (**a**, **b**); Schematic illustrating the stacking mode of different 2D layers in CP **2** (sapphire nodes, Cd(II); green, tetradentate  $L^{2-}$ ) (**c**).

(a)

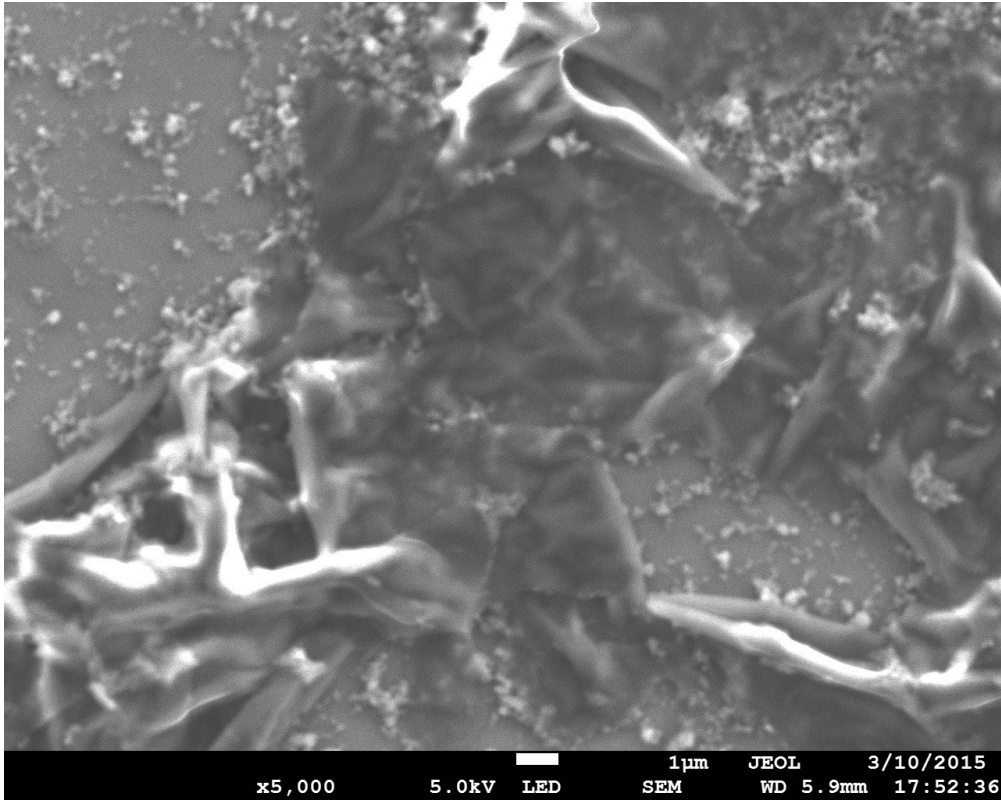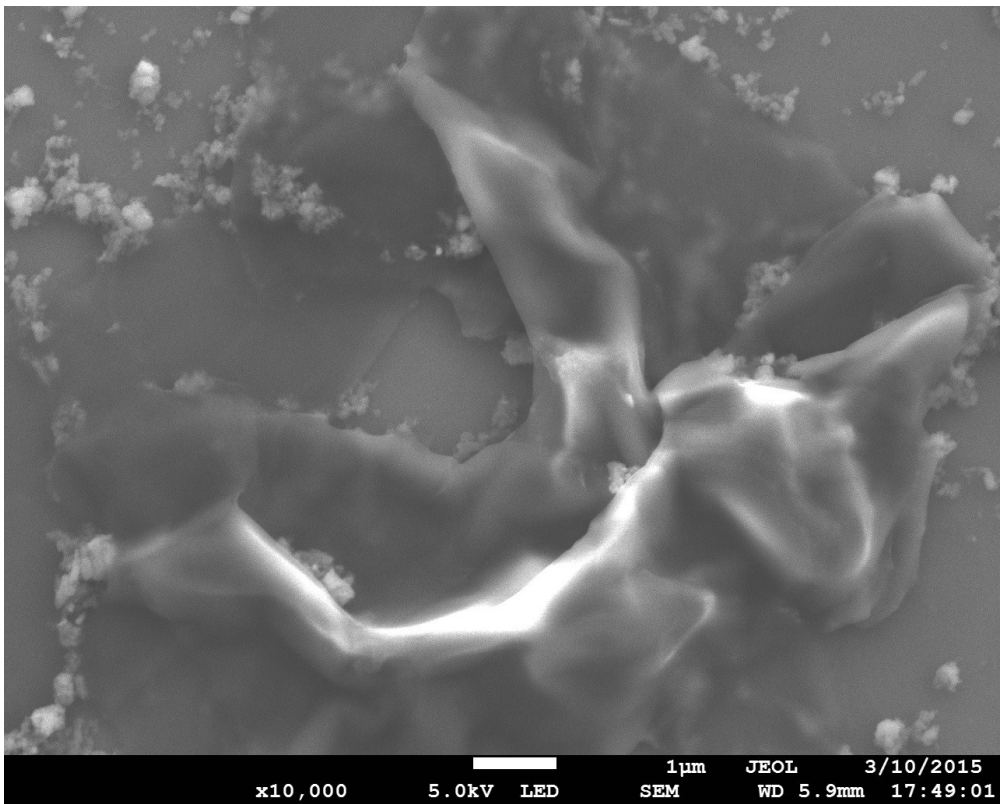

(b)

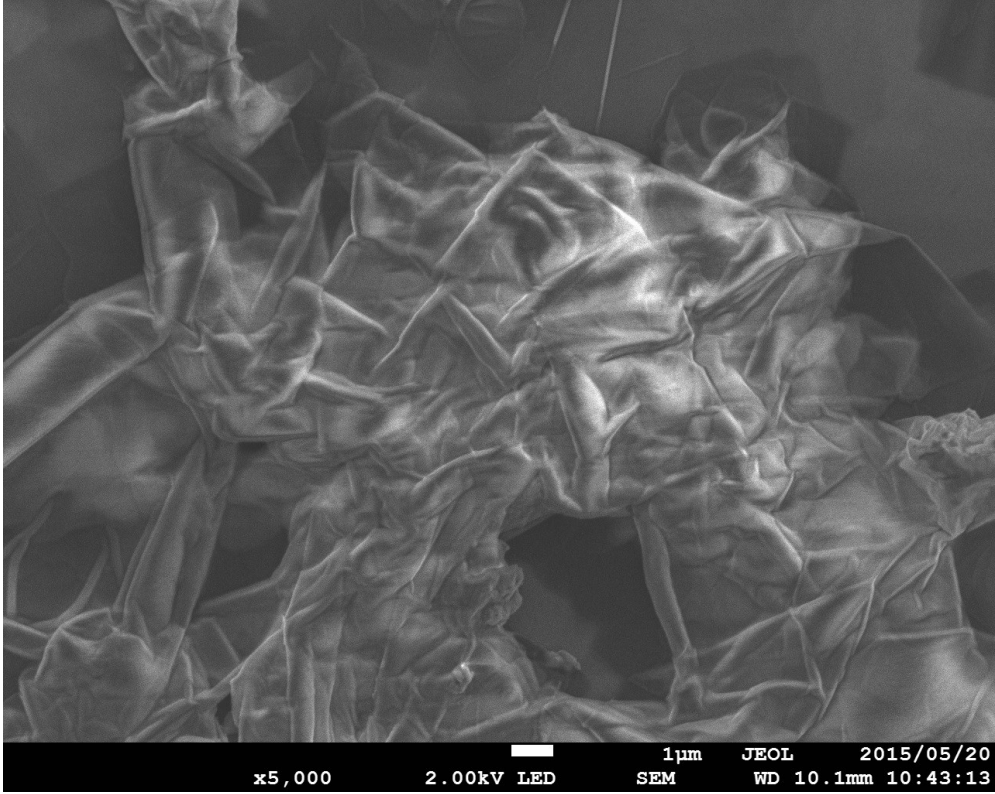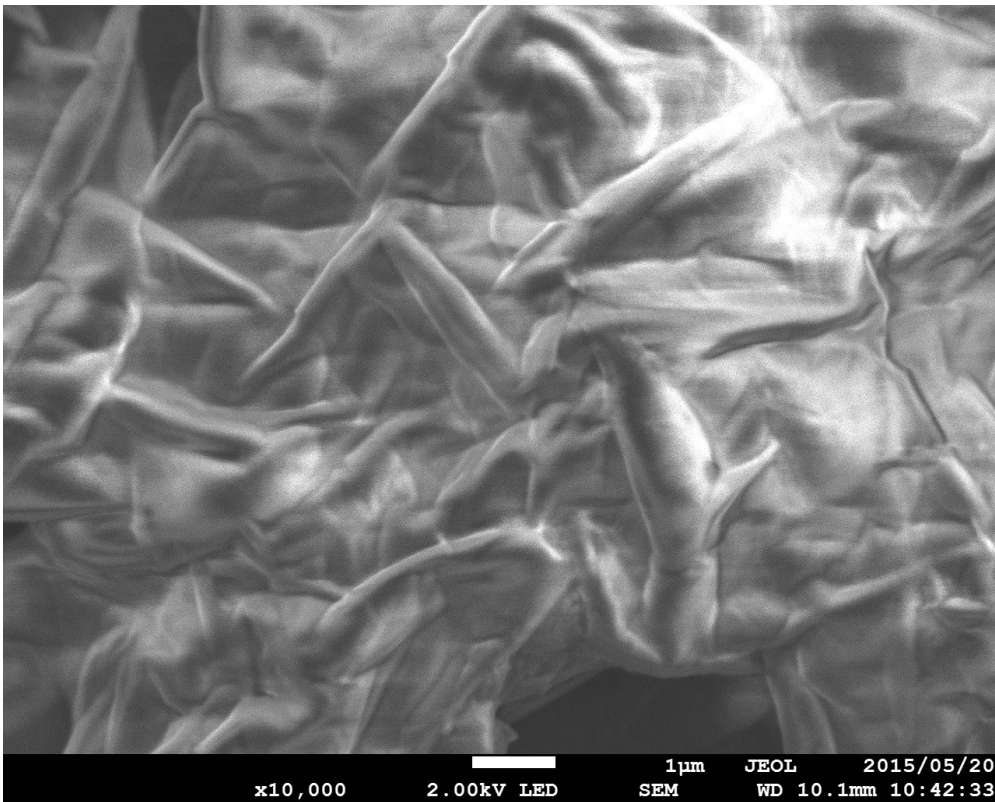

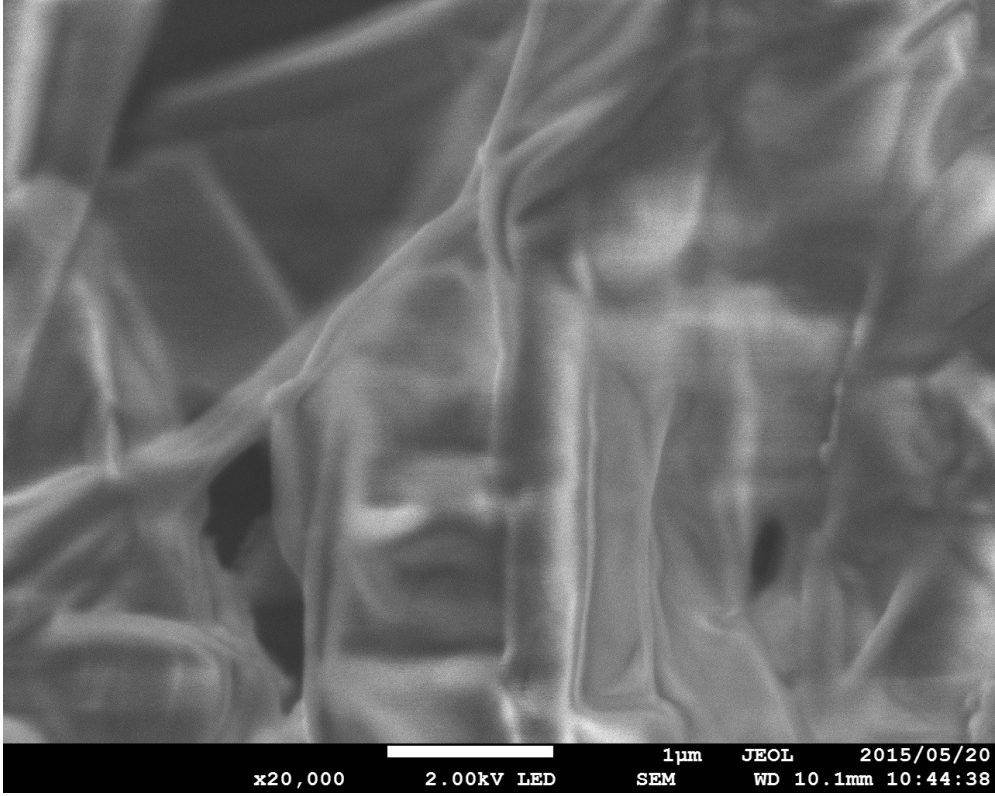

(c)

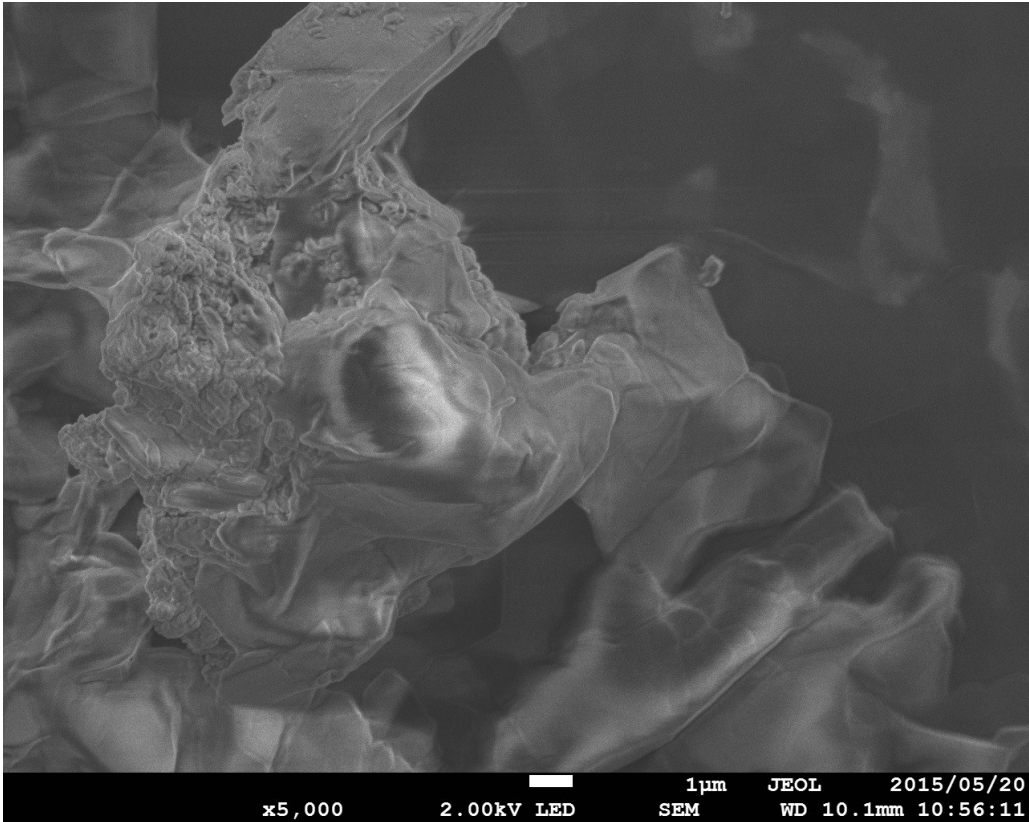

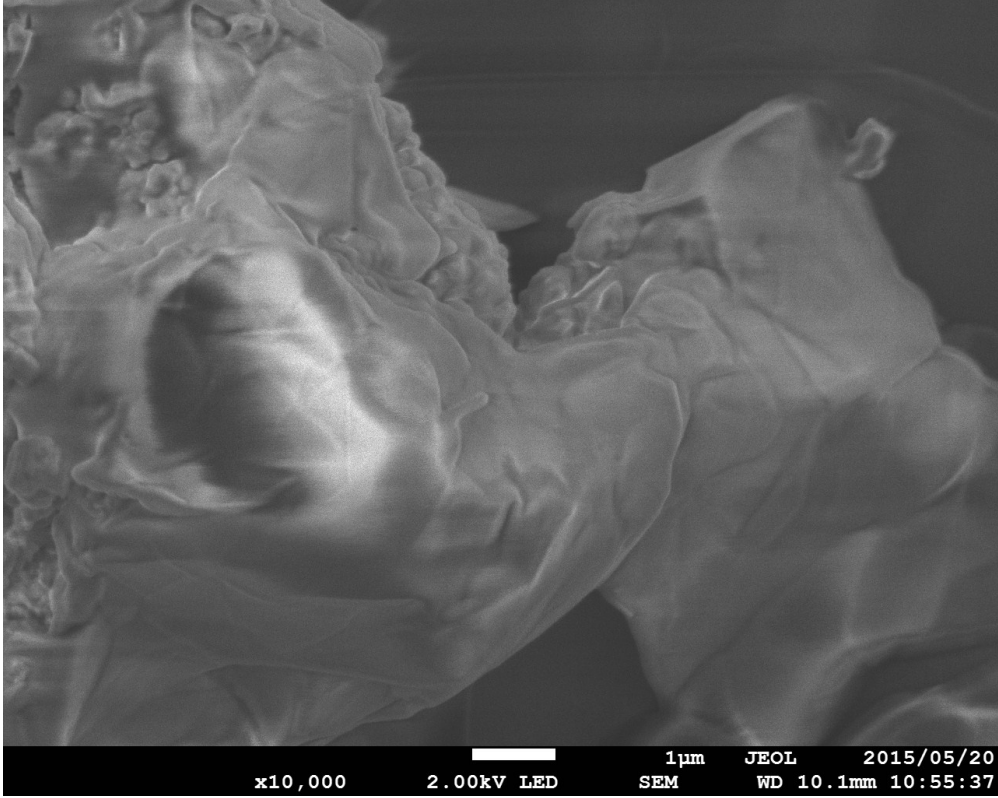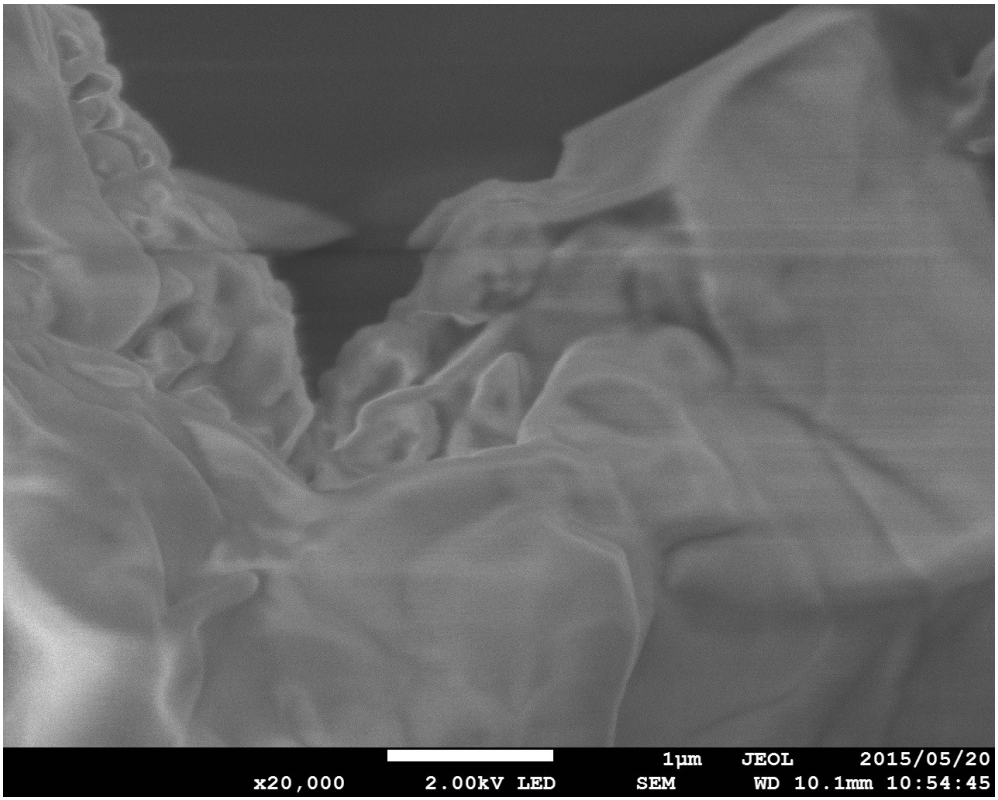

(d)

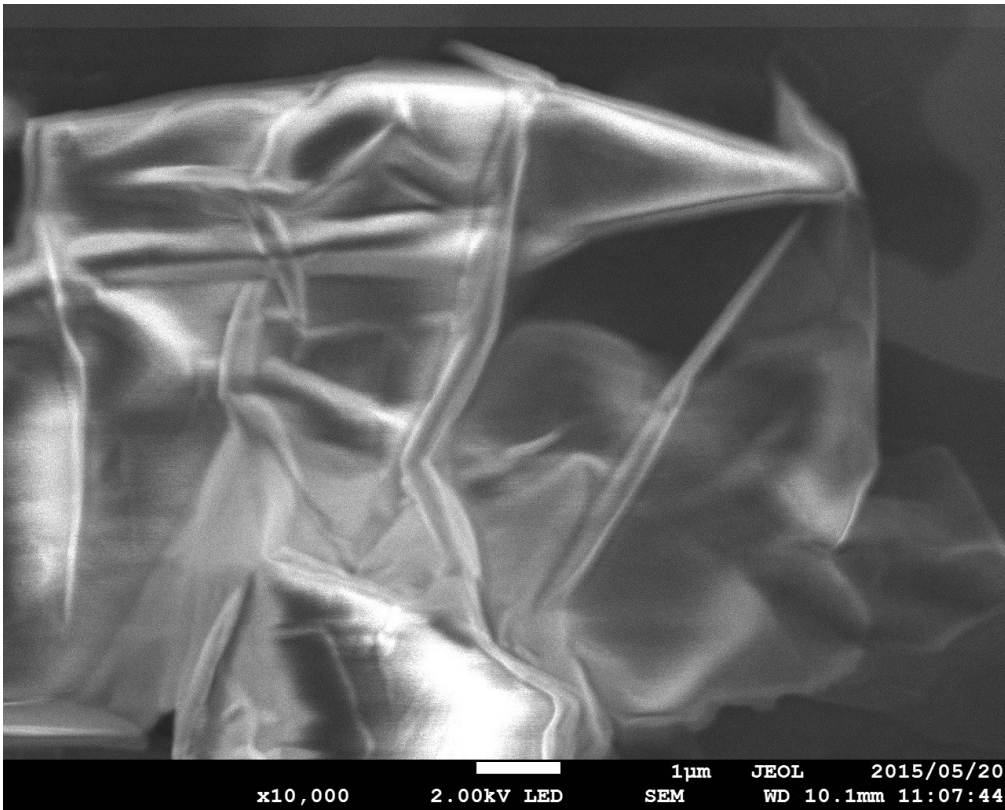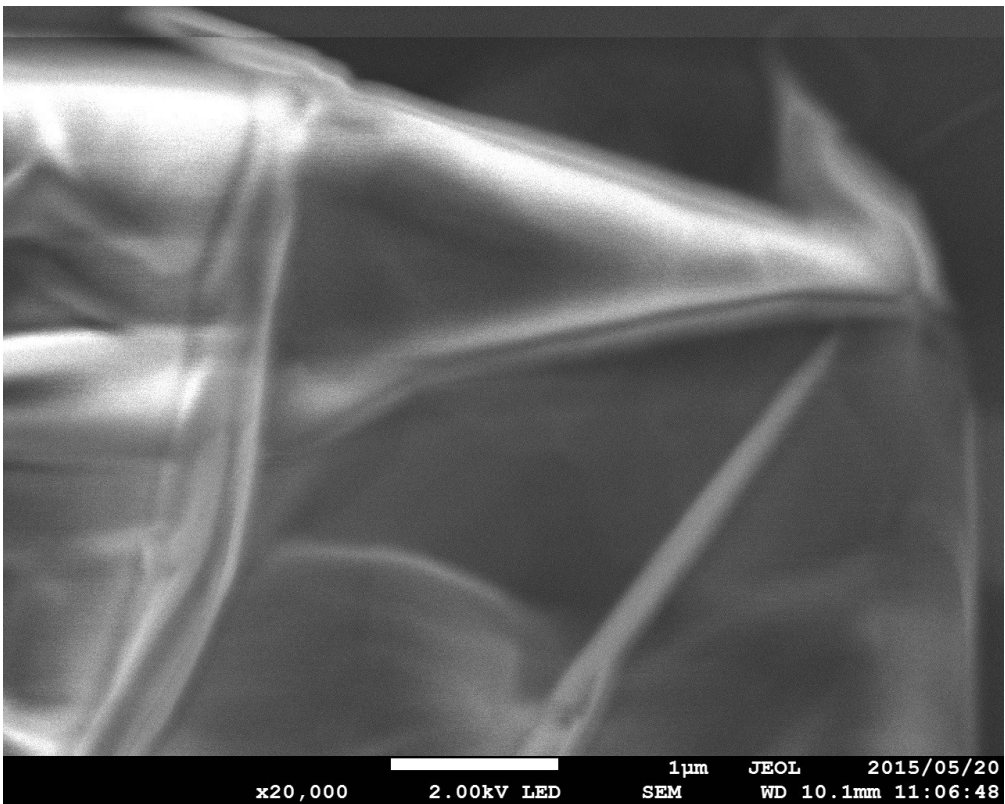

**Fig. S2** SEM images of few-layered CP 2 via physical exfoliation (a); via in situ



synthesis in the presence of PVP, PVP/ligand = 1: 100 (**b**); PVP/ligand = 1: 200 (**c**); in the presence of PEG 6000, PEG/ligand = 1:60 (**d**).

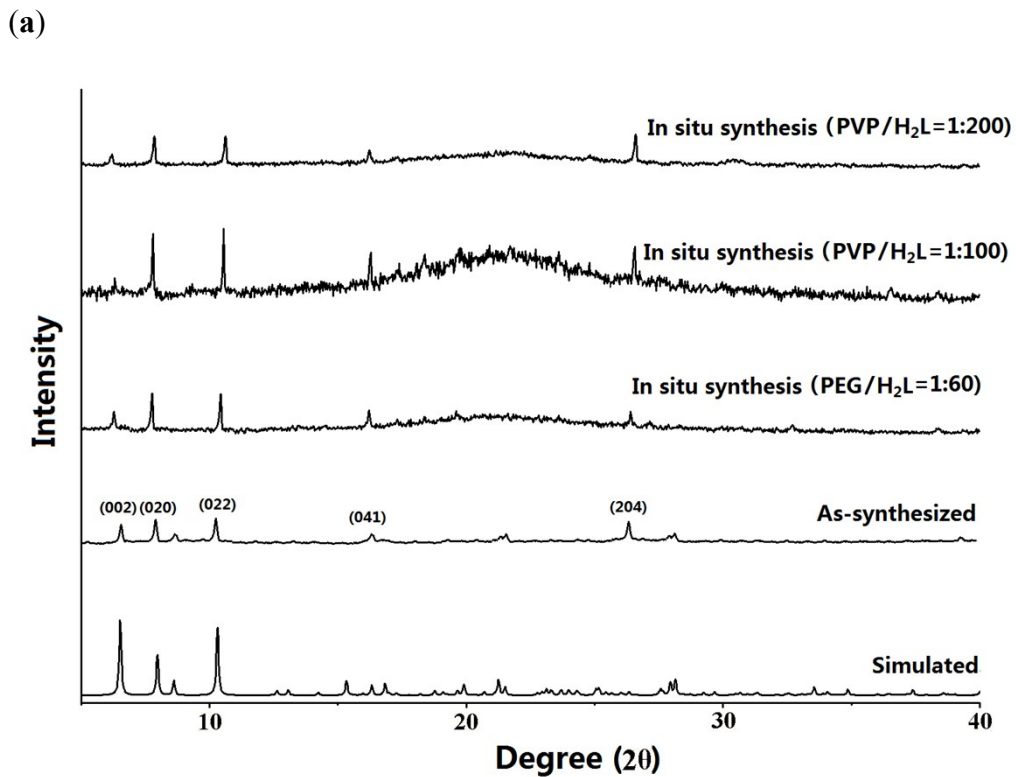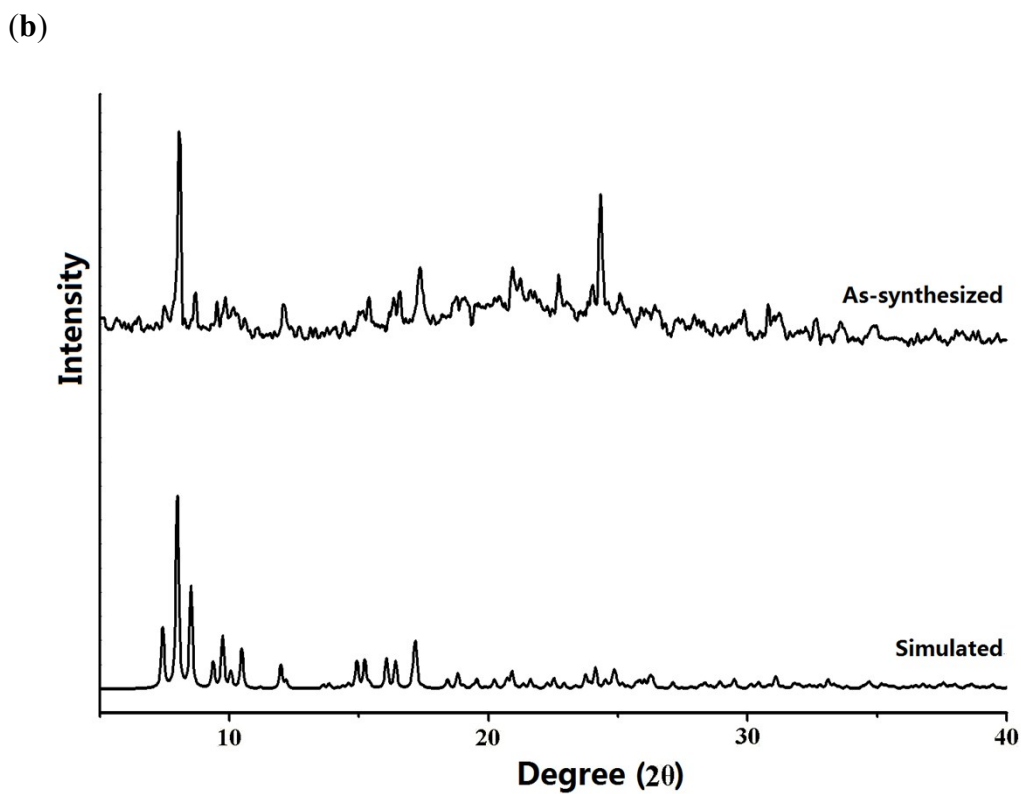

Fig. S3 The powder XRD patterns of CPs 1 (a) and 2 (b).

**(a)**

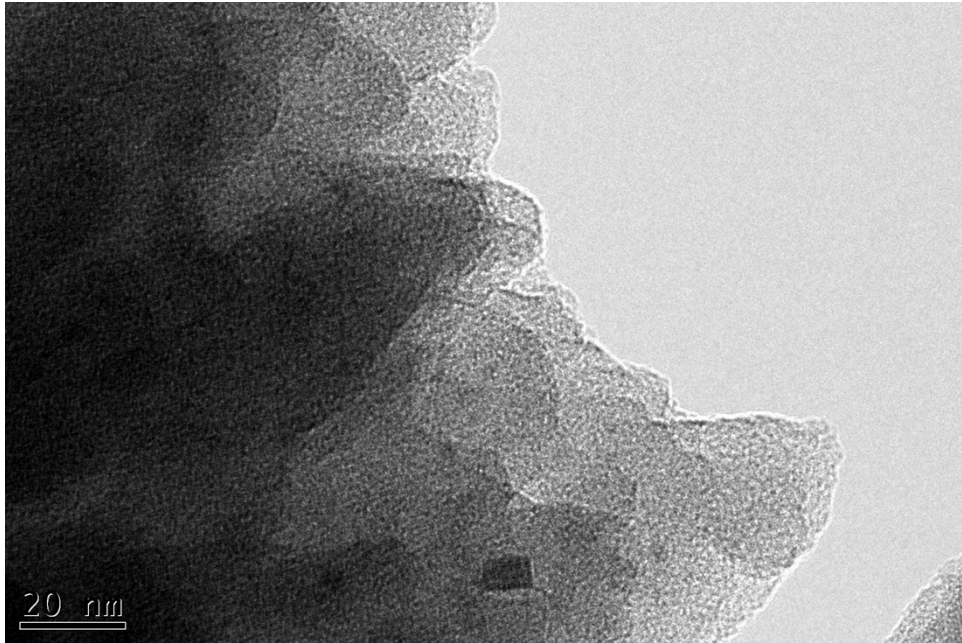

**(b)**

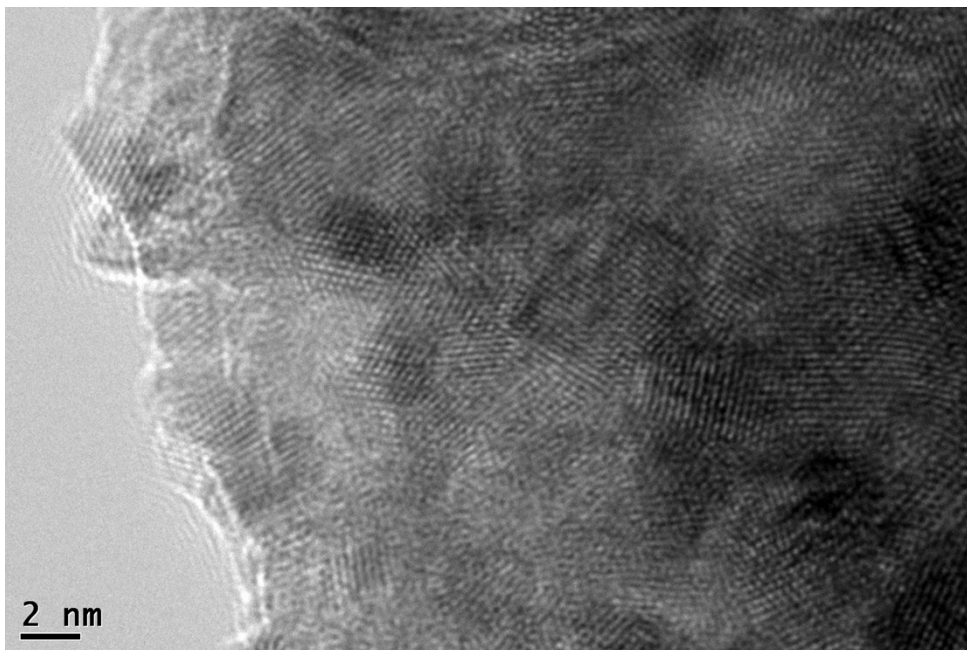

**(c)**

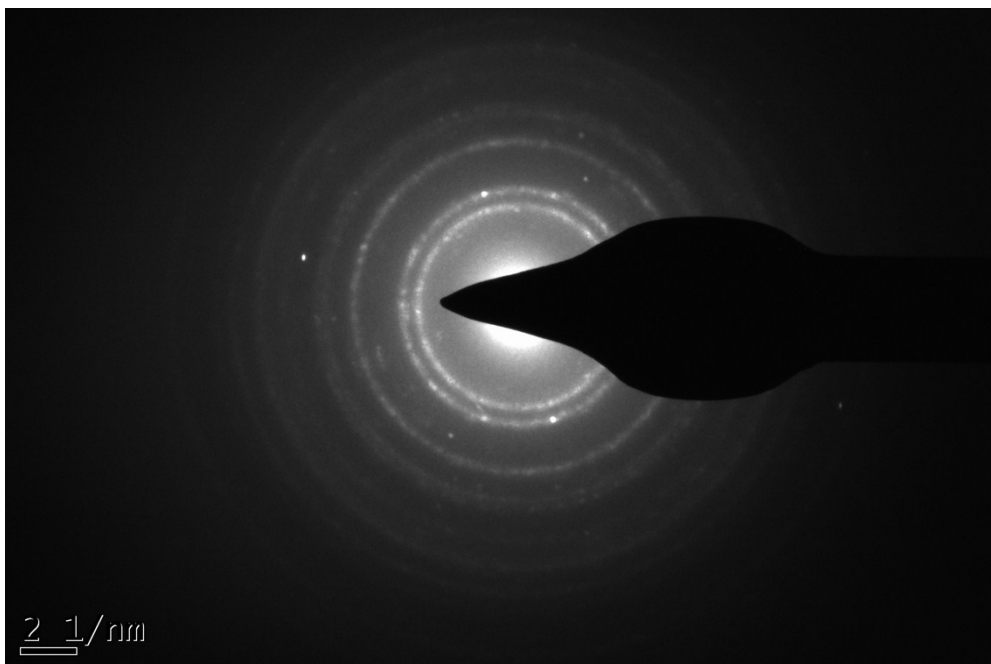

**Fig. S4** Low- (a), high-magnification TEM images (b) and selected area electron diffraction (SAED) (c) of the few-layered CP 2.

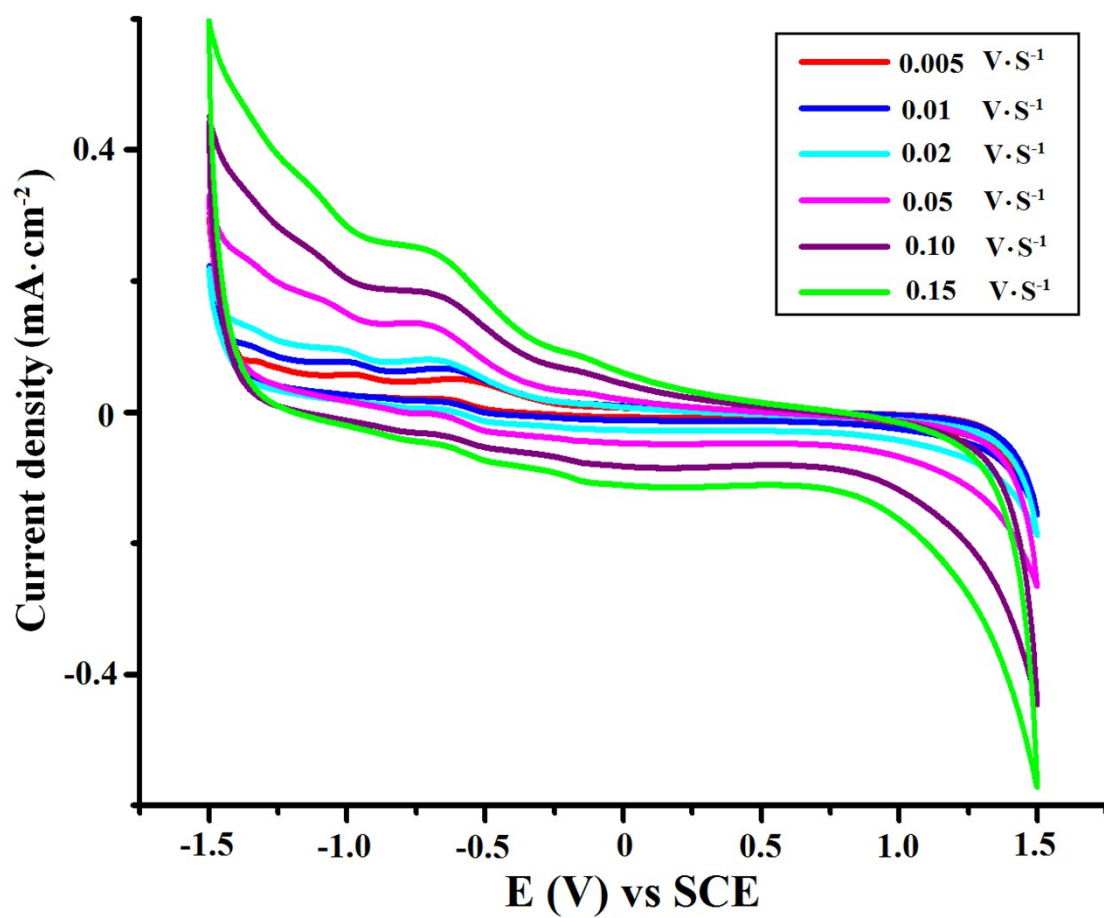

**Fig. S5** CVs of the bare GCE in an aqueous solution buffered to neutral pH (pH = 6.8,  $\text{H}_3\text{PO}_4/\text{NaOH}$ , 0.05 M) at different sweep rates.

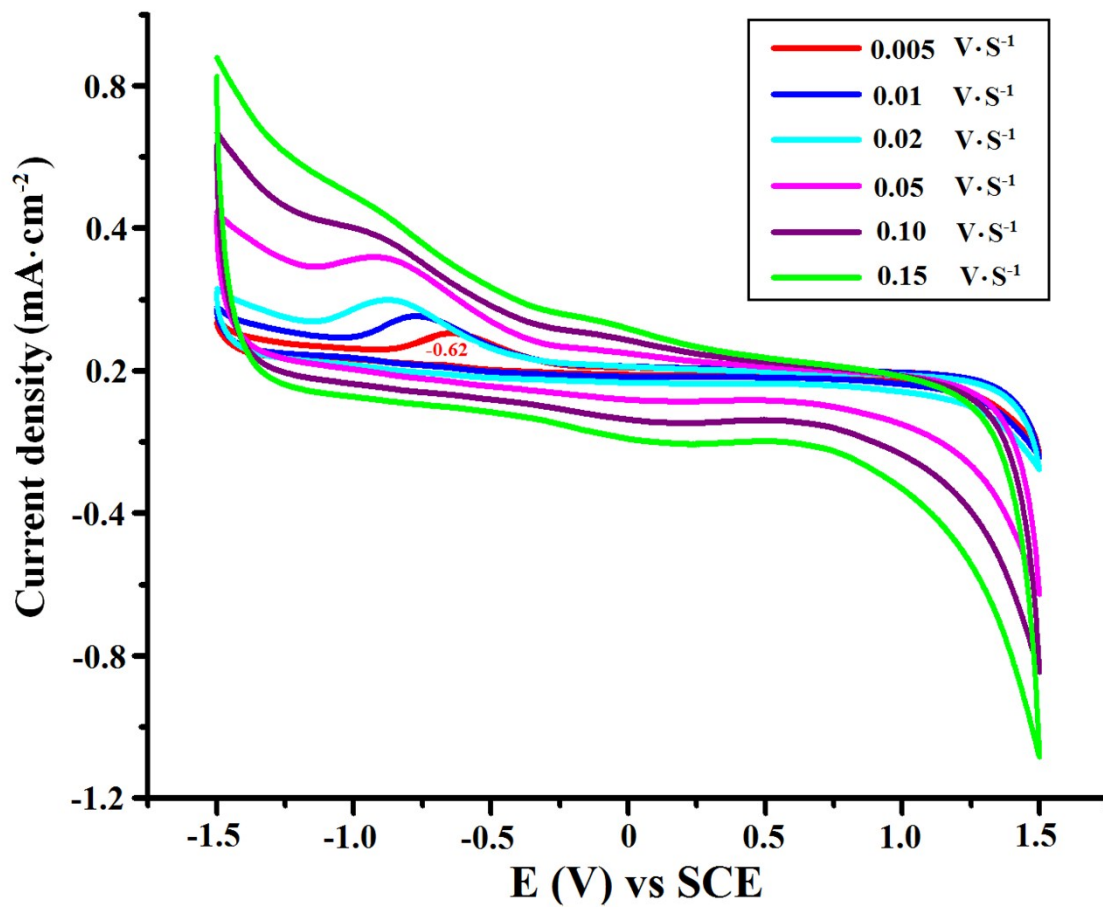

**Fig. S6** CVs of H<sub>2</sub>L-GCE in an aqueous solution buffered to neutral pH (pH = 6.8, H<sub>3</sub>PO<sub>4</sub>/NaOH, 0.05 M) at different sweep rates.

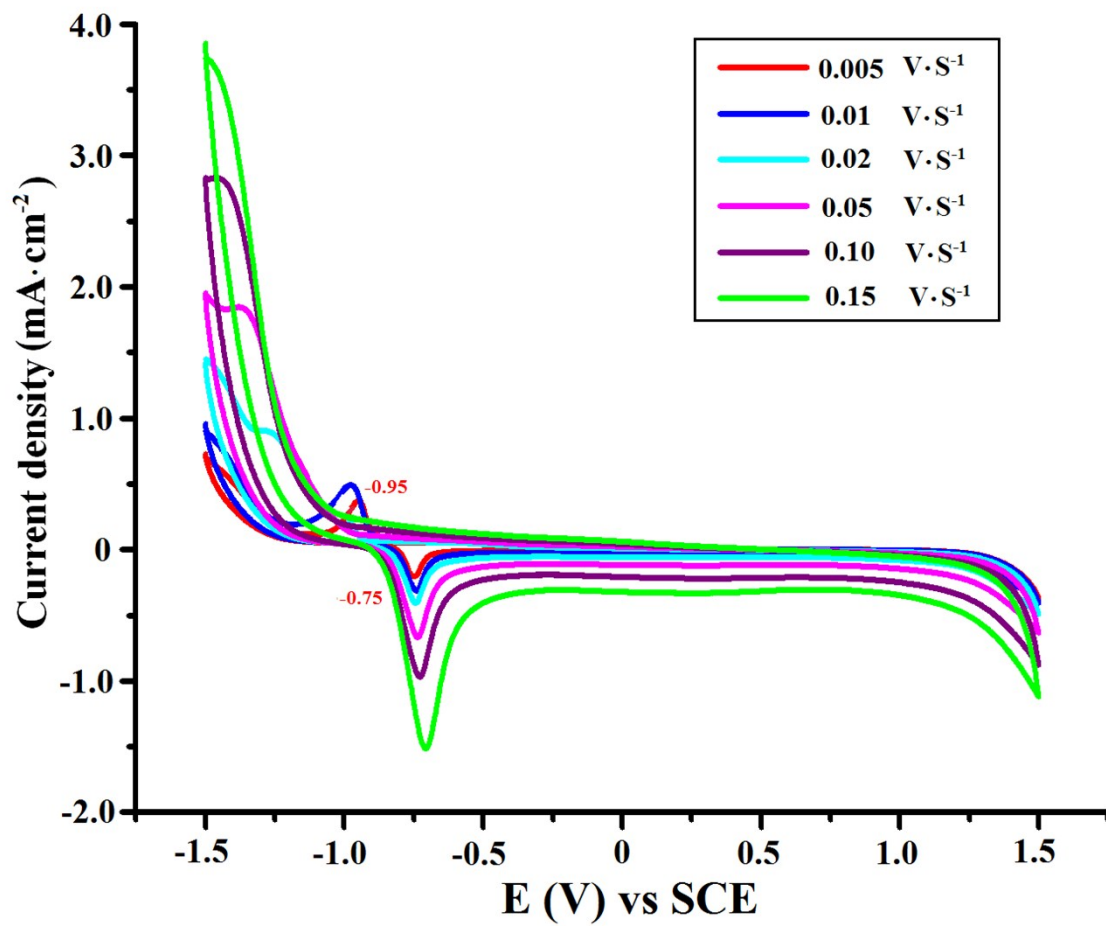

**Fig. S7** CVs of 1-GCE in an aqueous solution buffered to neutral pH (pH = 6.8, H<sub>3</sub>PO<sub>4</sub>/NaOH, 0.05 M) at different sweep rates.

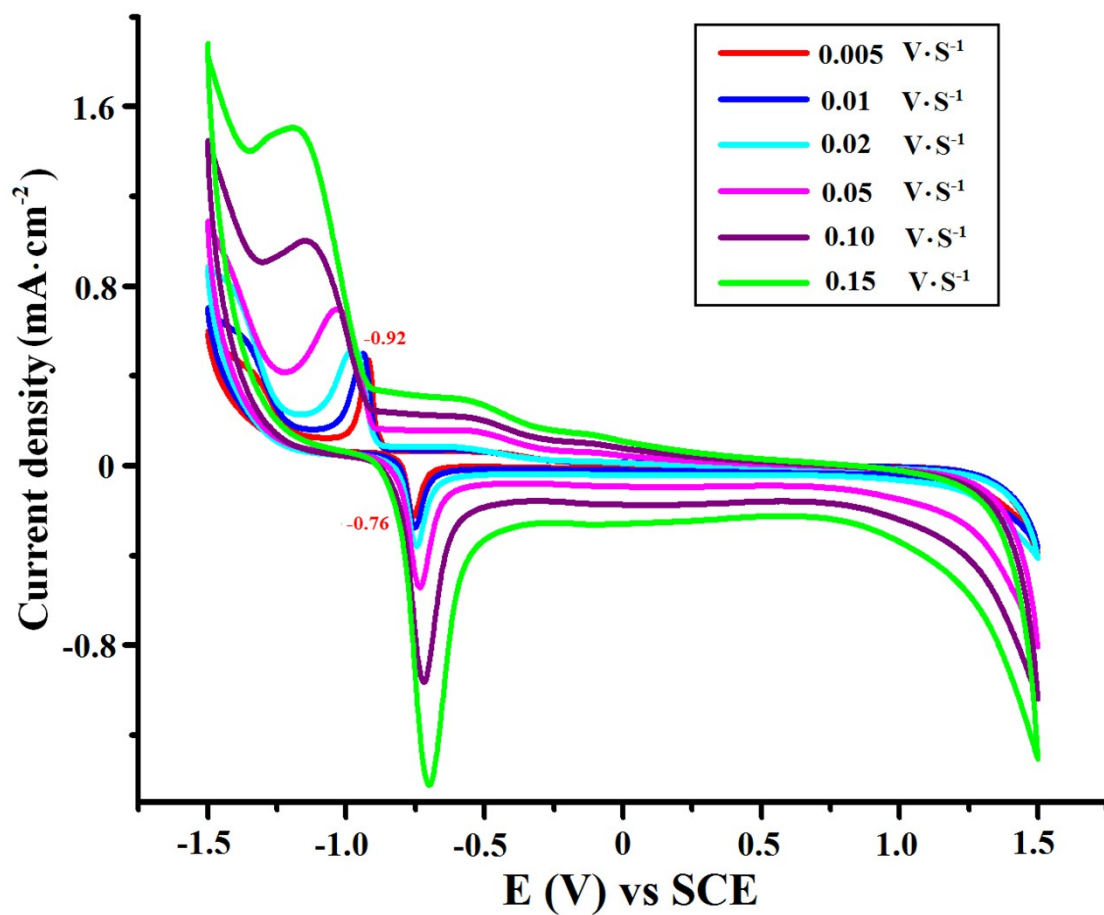

**Fig. S8** CVs of 2-GCE in an aqueous solution buffered to neutral pH (pH = 6.8, H<sub>3</sub>PO<sub>4</sub>/NaOH, 0.05 M) at different sweep rates.



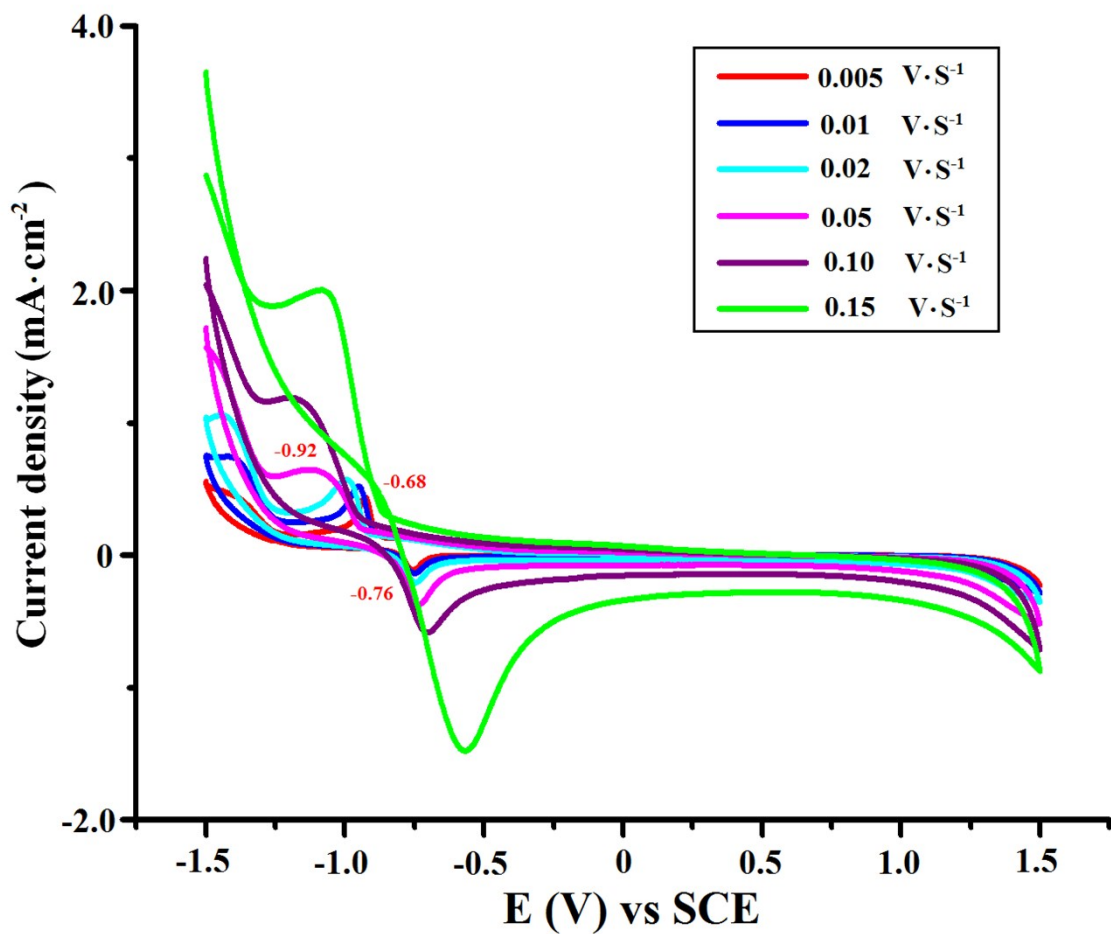

**Fig. S9** CVs of the few-layered CP 2-modified GCE in an aqueous solution buffered to neutral pH (pH = 6.8, H<sub>3</sub>PO<sub>4</sub>/NaOH, 0.05 M) at different sweep rates.

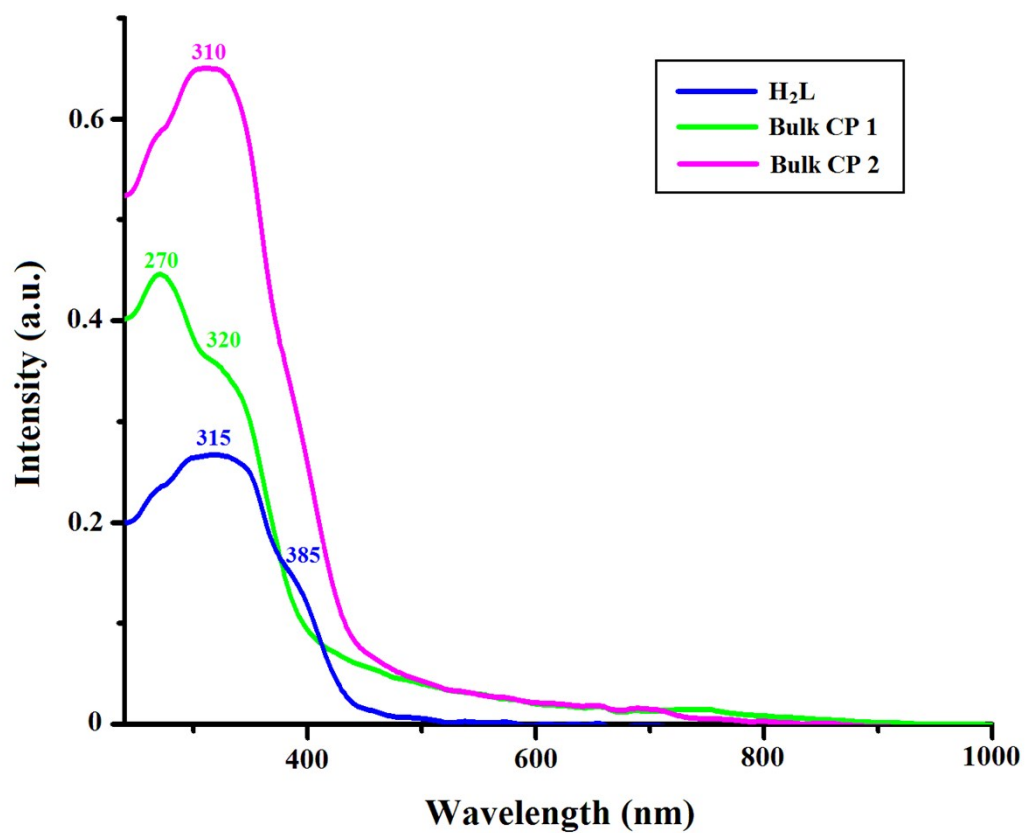

**Fig. S10** UV-vis absorption spectra for bulk CPs 1-2 and H<sub>2</sub>L in the solid state.

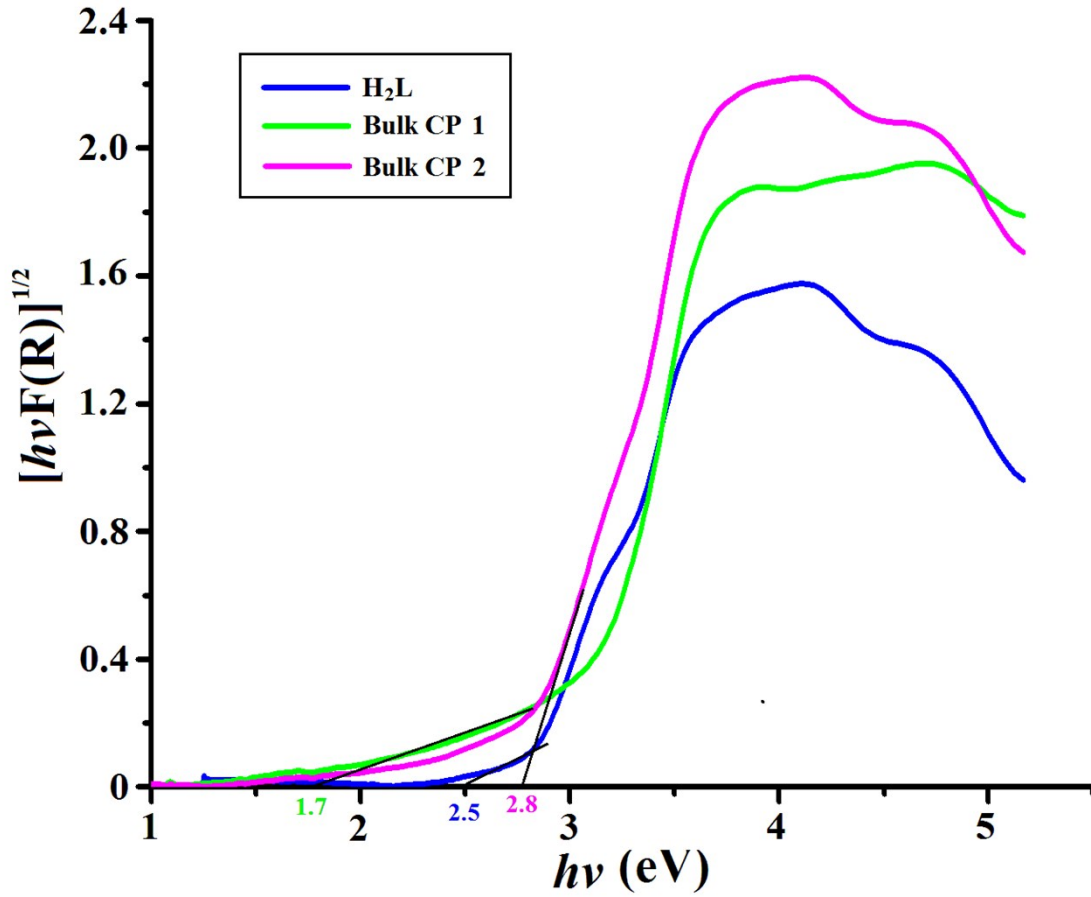

**Fig. S11** The diffuse reflectance spectra of **H<sub>2</sub>L**, bulk CPs **1** and **2** in Kubelka–Munk functions.

The diffuse reflectance spectra of **H<sub>2</sub>L** and CPs **1-2** are shown in **Fig. S11**. The correlation between the absorption coefficient of allowed indirect semiconductor and optical band gap  $E_{\text{gap}}$  can be determined by the equation

$$\alpha E \approx A_1(E - E_{\text{gap}})^2 \quad (1)$$

where  $E = hv$  is the photon energy,  $A_1$  is a constant.

$F(R)$  is the Kubelka–Munk equation, which is expressed as

$$F(R) = (1-R)^2/2R = k/s \quad (2)$$

where  $R$  is the experimentally observed reflectance of the sample,  $k$  is the molar absorption coefficient, and  $s$  is the scattering coefficient. The scattering coefficients are weakly dependent on the wavelength of the incident light, and using eqs 1 and 2, the following eq 3 can be obtained:

$$[h\nu F(R)]^{1/2} = A_2[h\nu - E_{\text{gap}}] \quad (3)$$

From the plot of  $[h\nu F(R)]^{1/2}$  versus  $h\nu$ , by extrapolating the linear fitted regions to  $[h\nu F(R)]^{1/2}=0$ , the value of optical band gaps  $E_{\text{gap}}$  of **H<sub>2</sub>L** and CPs **1-2** are ca. 2.5, 1.7 and 2.8 eV, respectively.

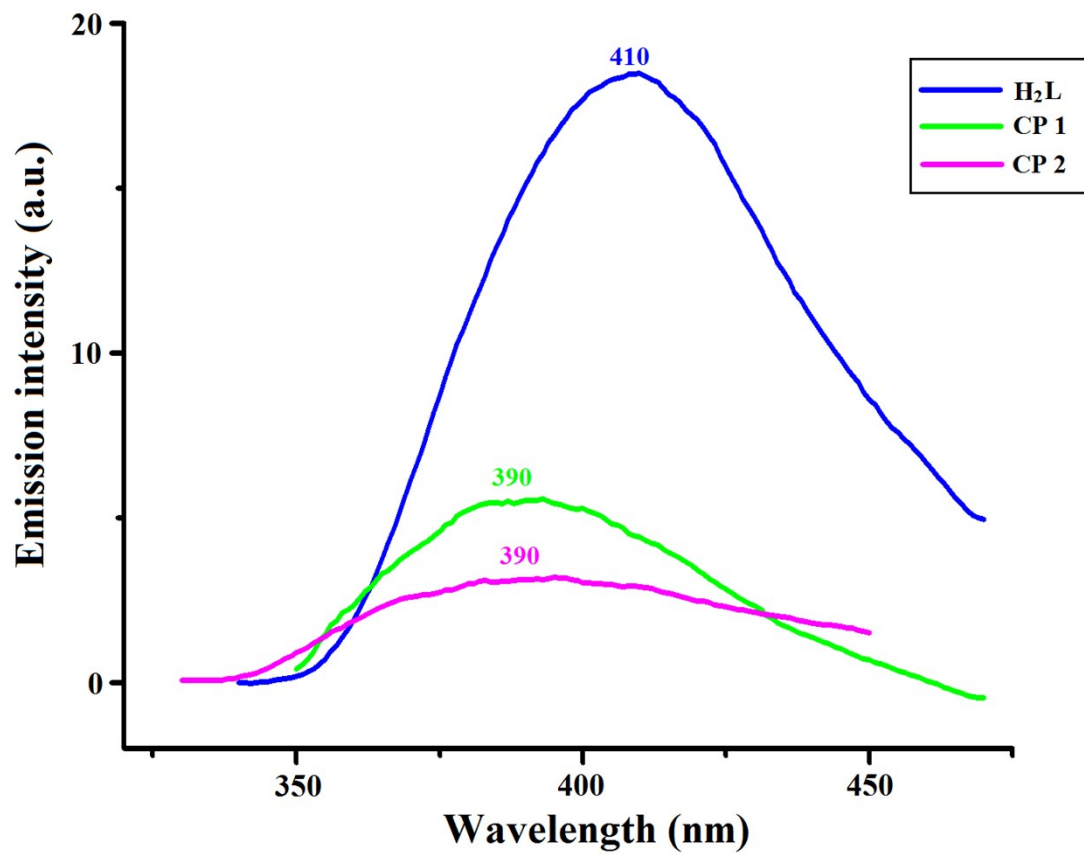

**Fig. S12** Solid-state emission spectra at room temperature for H<sub>2</sub>L and CPs 1-2 (slit width = 10 nm).

(a)

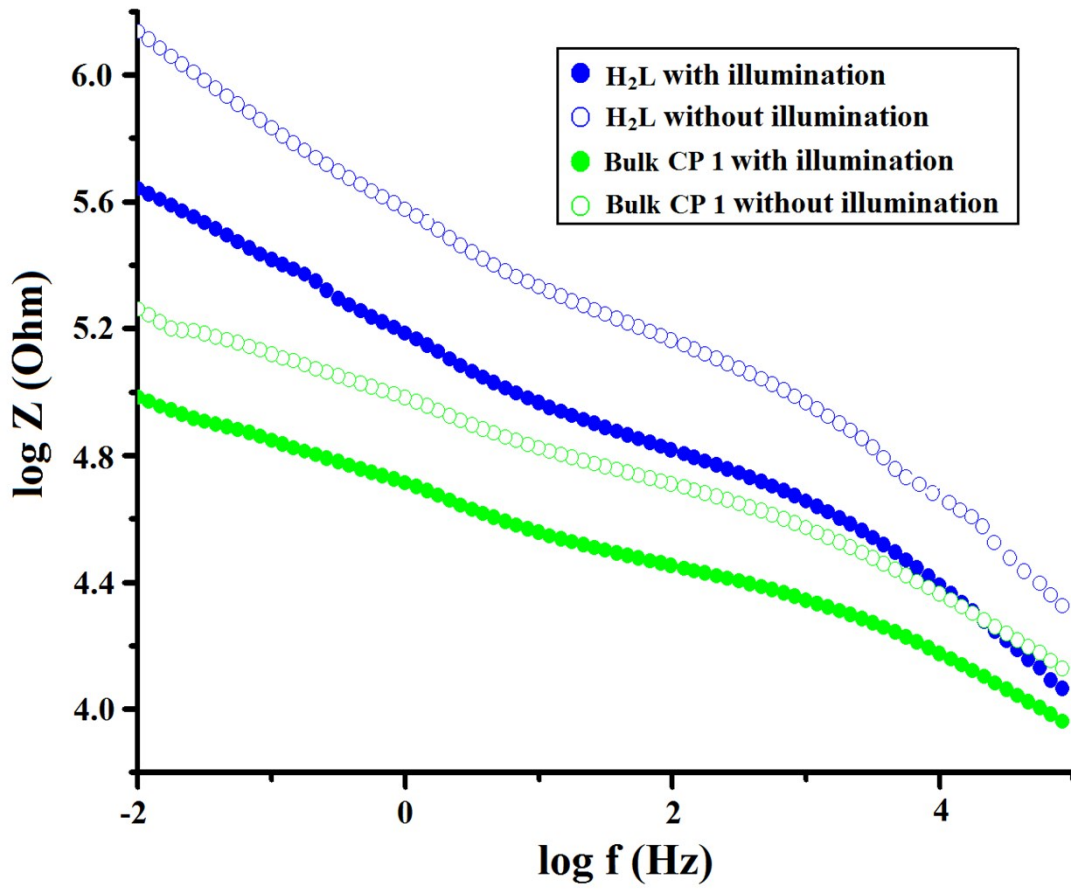

(b)

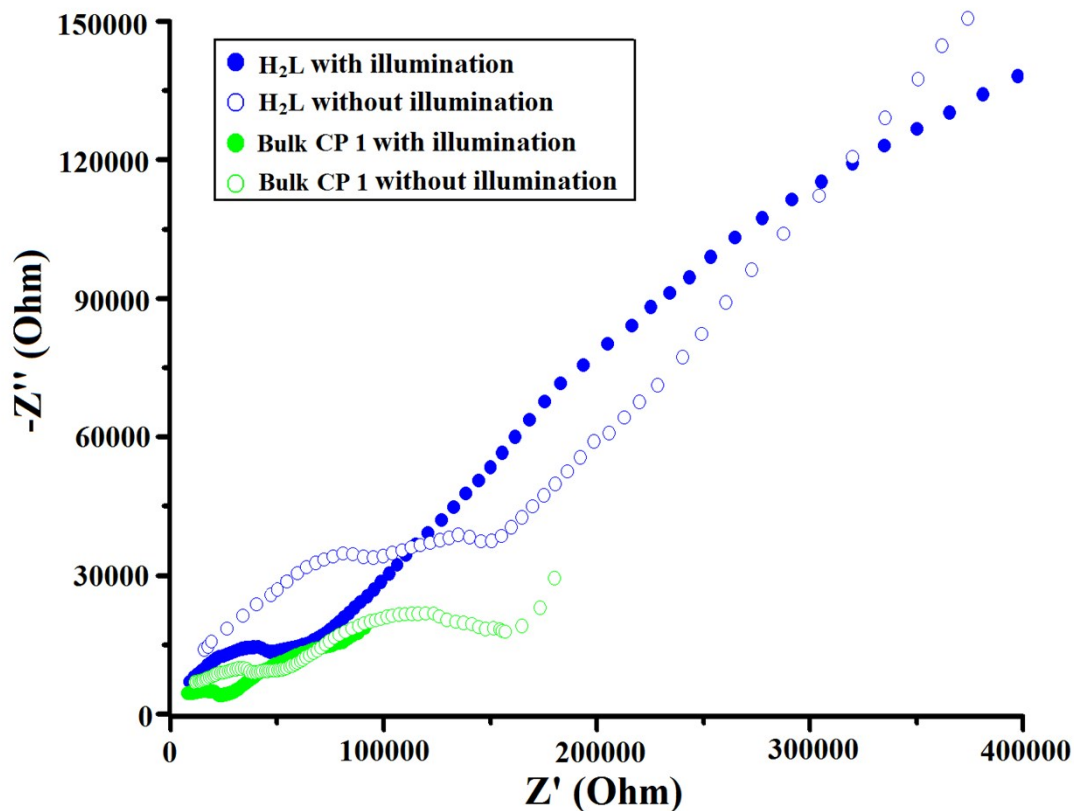

**Fig. S13** Bode plots (log of impedance magnitude vs. log f) (a) and Nyquist plots ( $Z'$  vs.  $-Z''$ ) (b) of the three-electrode systems at  $E = 0$  V vs Ag/AgCl in aqueous phosphate solution (0.05 M, pH = 6.8) in the absence and presence of visible light illumination ( $\lambda > 400$  nm) with **1-FTO** and **H<sub>2</sub>L-FTO** as working electrodes, respectively.

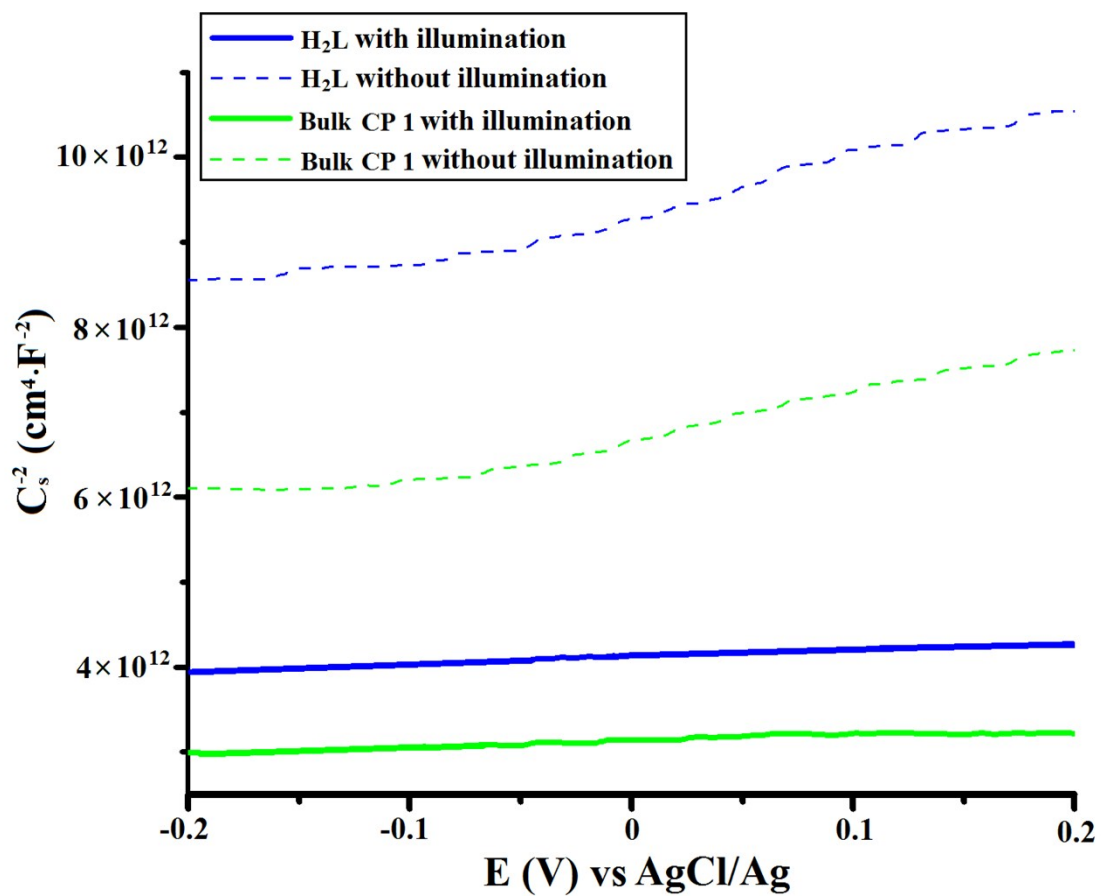

Fig. S14 Mott-Schottky curves of H<sub>2</sub>L-FTO and 1-FTO (ac amplitude: 5 mV, frequency: 1000 Hz) in the absence and presence of visible light illumination ( $\lambda > 400$  nm).



(a)

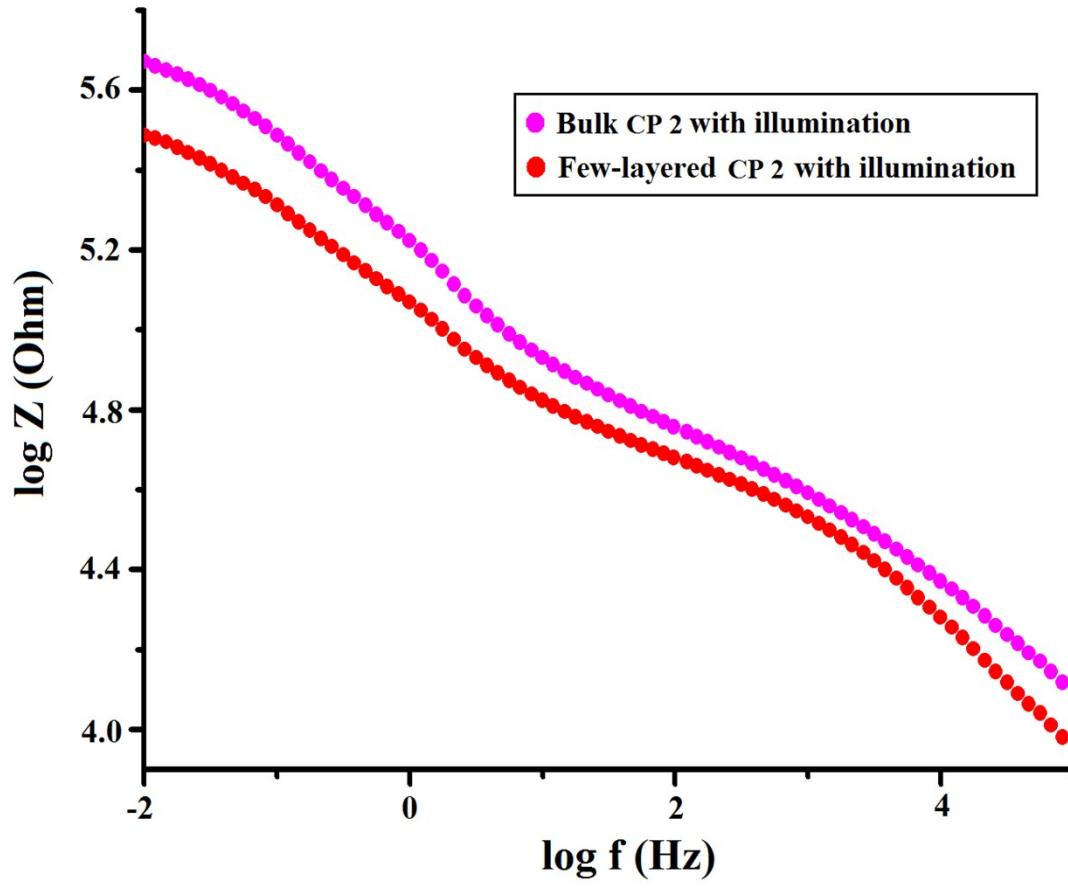

(b)

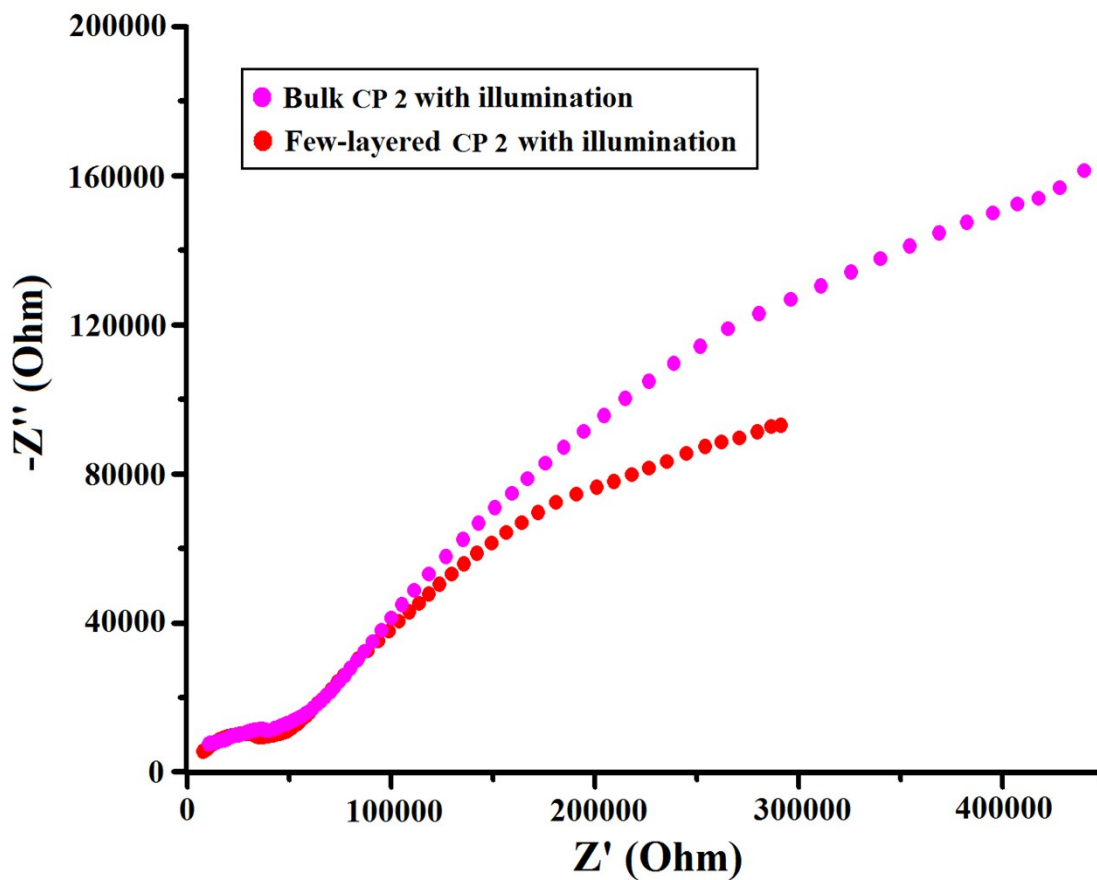

**Fig. S15** Bode plots (log of impedance magnitude vs. log f) (a) and Nyquist plots ( $Z'$  vs.  $-Z''$ ) (b) of the three-electrode systems at  $E = 0$  V vs Ag/AgCl in aqueous phosphate solution (0.05 M, pH = 6.8) in the presence of visible light illumination ( $\lambda > 400$  nm) with **2-FTO** and the few-layered CP **2**-modified **FTO** as working electrodes, respectively.

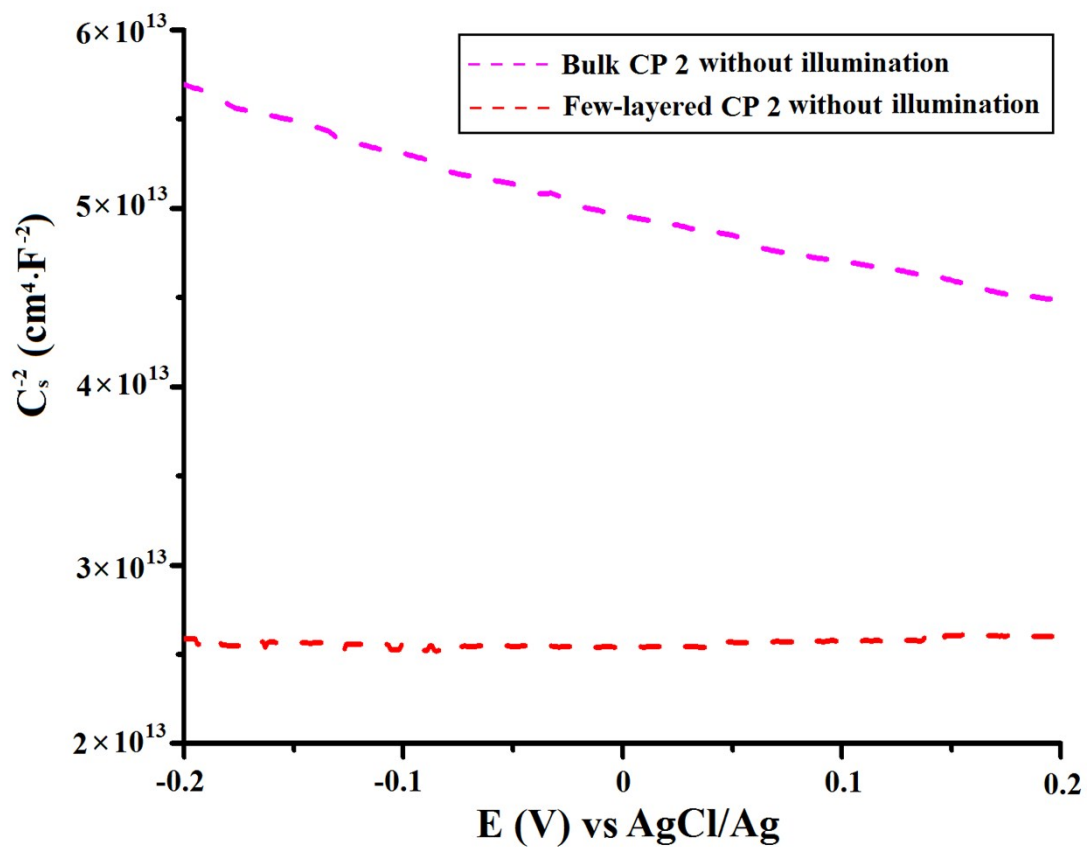

**Fig. S16** Mott-Schottky curves of **2-FTO** and the few-layered CP **2**-modified **FTO** (ac amplitude: 5 mV, frequency: 1000 Hz) in the absence of visible light illumination.

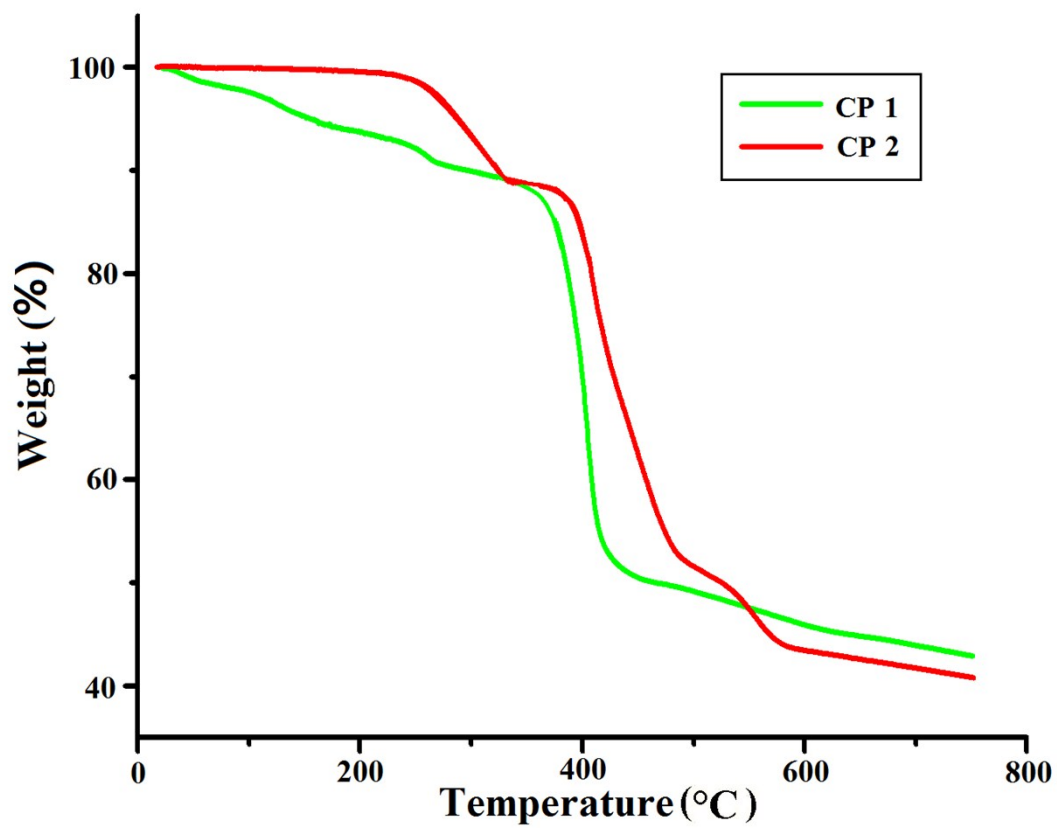

Fig. S17 Thermogravimetric curves of CPs 1 and 2.
